# Supplementary material for: Impact of heterozygous hemoglobin E on six commercial methods for hemoglobin A1c measurement
Source: PeerJ journal article supplement (doi:10.7717/peerj-achem.9), 2021-03-23
Supplement: 200923_CML_Summary_for_Peer_J.xlsx [file 200923_CML_Summary_for_Peer_J.xlsx]

## Sheet: Results
Unit	%
HbE Samples	Variant II Turbo 2.0	Cobas B 101	D 100	DCA Vantage	Tina-quant HbA1c Gen.3	HbA1c Advanced	Hba1c Value from HSA IDMS
Unique ID	Y axis	Y axis	Y axis	Y axis	Y axis	Y axis	X-axis
6096	5.2	5.4	4.9	5.1	4.9	4.8	5.35
6094	5.8	5.7	5.3	5.1	5.1	4.98	5.47
9577	5.7	5.6	5.3	5.2	5	4.95	5.46
9168	6.3	6.5	5.8	5.7	5.9	5.56	6.22
4600	6.8	7.1	6.5	6.5	6.5	6.27	6.66
5827	7	6.7	6.5	6.4	6.3	6.13	6.62
3377	8.8	8.6	8.2	8.1	8.1	8.12	8.84
2469	9.1	9.7	8.5	8.8	8.7	8.22	9.09
7320	10.8	11.5	10.2	10.9	11.3	10.47	11.49
1546	11.1	11.6	10.5	11.5	11.1	10.52	11.55
9688	6.2	6	5.6	5.7	5.53	5.52	5.84
3031	6.2	6.1	5.7	5.6	5.51	5.53	6.03
8990	6.3	6.1	5.8	5.7	5.37	5.54	6.01
5608	7	7.1	6.5	6.5	6.36	6.44	6.85
2708	7.9	8.2	7.4	7.2	7.57	7.08	7.8
8771	8.9	9.4	8.3	8.5	8.57	8.42	8.97
6557	9.4	10.5	8.9	9.9	9.67	9.27	10.51
6341	10.4	10.9	10	10.5	10.11	9.69	10.47
9028	5.1	6.3	5.2	6	5.97	5.7	5.96
8663	6.7	6.6	6	6	5.91	5.8	6.15
3354	6.6	7	6.3	6.3	6.33	6.2	6.88
8820	7.4	7.3	6.8	6.9	7.03	6.9	7.17
8526	7.9	7.8	7	7.3	7.12	6.9	7.4
Unit	%
NORMAL Samples	Variant II Turbo 2.0	Cobas B 101	D 100	DCA Vantage	Tina-quant HbA1c Gen.3	HbA1c Advanced	Hba1c Value from HSA IDMS
Unique ID	Y axis	Y axis	Y axis	Y axis	Y axis	Y axis	X-axis
8719	4.7	4.9	5	4.8	4.78	4.8	5.01
8919	5.2	5.4	5.3	5.4	5.41	5.3	5.63
9883	5.3	5.5	5.5	5.5	5.3	5.4	5.63
8519	5.7	5.9	5.9	5.9	5.71	5.8	6.1
7887	6.1	6.3	6.2	6.3	6.21	6.2	6.54
8680	6.5	6.6	6.4	6.3	6.56	6.5	7.11
8733	6.5	6.5	6.6	6.3	6.45	6.5	7.01
9501	7.1	7.1	6.9	6.7	6.51	6.7	7.56
8423	7	7.3	7	6.8	6.96	6.7	7.28
8638	7.1	7.2	7.2	7.1	6.96	7	7.31
8386	7.5	7.6	7.4	7	6.98	7.2	8
9613	7.8	7.9	7.6	7.4	7.74	7.5	8.56
9971	8.1	8	7.8	7.9	7.79	7.6	8
7962	8.5	8.7	8.4	8.5	8.45	8.2	8.93
8396	8.5	8.5	8.3	8.3	8.26	8.1	8.95
9636	9.1	9.1	8.8	8.7	8.74	8.6	9.04
8560	10.1	9.9	9.6	9.9	9.79	9.3	10.42
1764	10.1	9.8	9.9	9.8	10.08	9.6	10.55
9162	10.3	10.2	9.9	10.1	10.15	9.8	10.78
7594	12.2	12.9	11	11.7	11.92	11.4	13.68
